# Supplementary material for: Ageritin—The Ribotoxin-like Protein from Poplar Mushroom (Cyclocybe aegerita) Sensitizes Primary Glioblastoma Cells to Conventional Temozolomide Chemotherapy
Source: MDPI journal article supplement (doi:10.3390/molecules27082385), 2022-04-07
Supplement: s1 [file s1]

Article

# Ageritin—The Ribotoxin-like Protein from Poplar Mushroom (*Cyclocybe aegerita*) Sensitizes Primary Glioblastoma Cells to Conventional Temozolomide Chemotherapy

Rossella Rotondo <sup>1,†</sup>, Sara Ragucci <sup>2,†</sup>, Salvatore Castaldo <sup>1</sup>, Nicola Landi <sup>2</sup>, Maria Antonietta Oliva <sup>1</sup>, Paolo V. Pedone <sup>2</sup>, Antimo Di Maro <sup>2,\*‡</sup> and Antonietta Arcella <sup>1,\*‡</sup>

<sup>1</sup> IRCCS Istituto Neurologico Mediterraneo NEUROMED, Via Atinense 18, 86077-Pozzilli, IS, Italy; rossella-ross1988@gmail.com (R.R.); castaldosal90@gmail.com (S.C.); mariaantonieta.oliva@neuromed.it (M.A.O.)

<sup>2</sup> Department of Environmental, Biological and Pharmaceutical Sciences and Technologies (DiSTABiF), University of Campania “Luigi Vanvitelli”, Via Vivaldi 43, 81100-Caserta, Italy; sara.ragucci@unicampania.it (S.R.); nicola.landi@unicampania.it (N.L.); paolovincenzo.pedone@unicampania.it (P.V.P.)

\* Correspondence: antimo.dimaro@unicampania.it (A.D.M.); arcella@neuromed.it (A.A.)

† These authors contributed equally to this work.

‡ These authors share equal senior authorship.

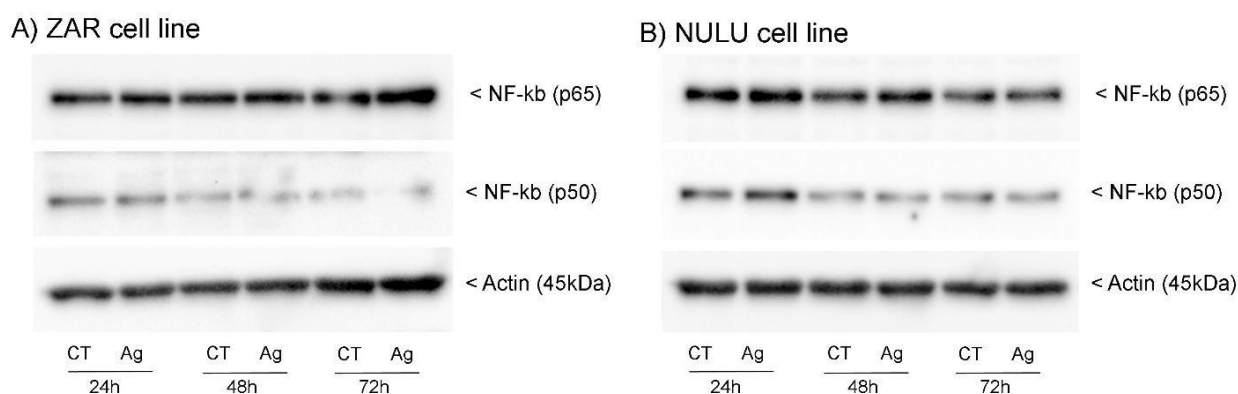

**Figure S1:** Western blot analysis of NF-κB p50 and p65 subunits in long-term Ageritin-treated patient-derived glioblastoma cell lines.
